# Supplementary material for: Interaction mechanism studies of 1H-tetrazole derivatives and nitrocellulose. Part 1: introduction of amino groups on C and N atoms
Source: Royal Society of Chemistry journal article supplement (doi:10.1039/d4nj01763c), 2024-01-01
Supplement: d4nj01763c1.pdf [file d4nj01763c1.pdf]

**Interaction Mechanisms studies of 1H-tetrazole derivatives and  
nitrocellulose Part1: Introduction of amino groups on C and N atoms**

Jianwei Zhang<sup>a,b</sup>, Chengming Bian<sup>c</sup>, Ling Chen <sup>a,b</sup>, Weidong He<sup>a,b\*</sup>

<sup>a</sup> School of Chemistry and Chemical Engineering, Nanjing University of Science and Technology,  
Nanjing, Jiangsu, 210094, China;

<sup>b</sup> Key Laboratory of Special Energy Materials, Ministry of Education, Nanjing, Jiangsu, 210094,  
China;

<sup>c</sup> School of Chemistry and Chemical Engineering, North University of China, Taiyuan, Shanxi,  
030051, China;

Corresponding Email: [hewedong@njust.edu.cn](mailto:hewedong@njust.edu.cn)



## S2. The gas products analysis of 5-ATZ and DATZ

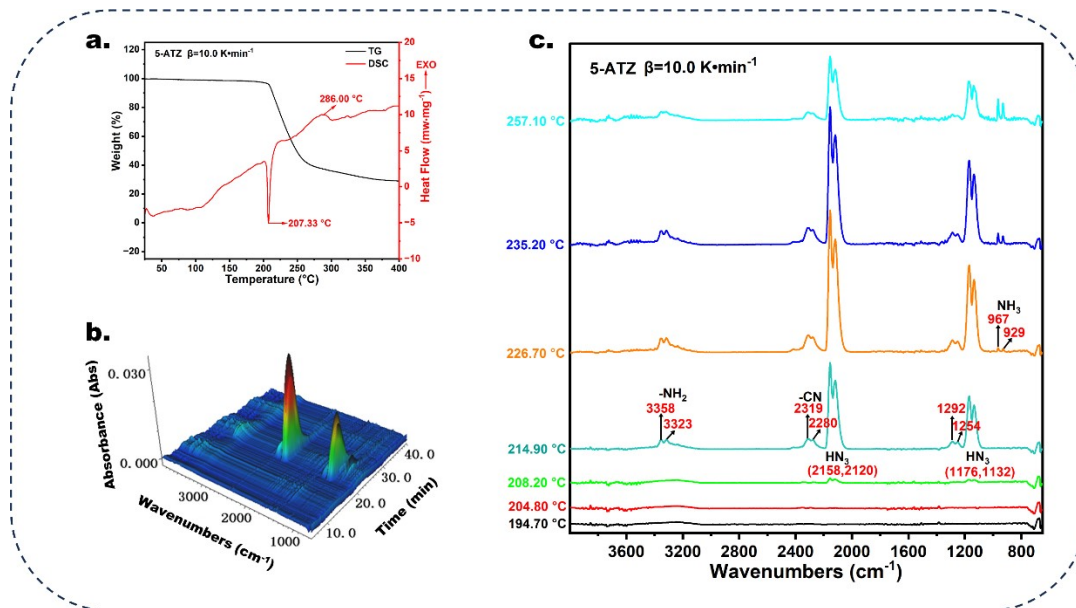

Fig.S2 The pyrolysis process of 5-ATZ: TG-DSC curves at the heating rate of  $10.0 \text{ K}\cdot\text{min}^{-1}$  (a.), 3D images (b.) and the characteristic absorption of pyrolysis gas (c.)

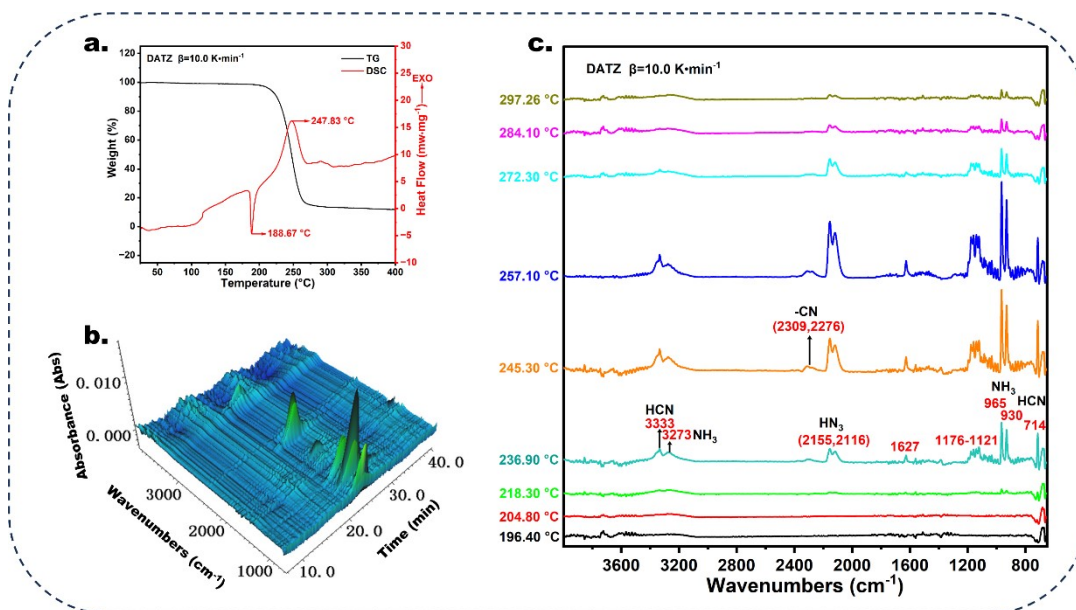

Fig.S3 The pyrolysis process of DATZ: TG-DSC curves at the heating rate of  $10.0 \text{ K}\cdot\text{min}^{-1}$  (a.), 3D images (b.) and the characteristic absorption of pyrolysis gas (c.)

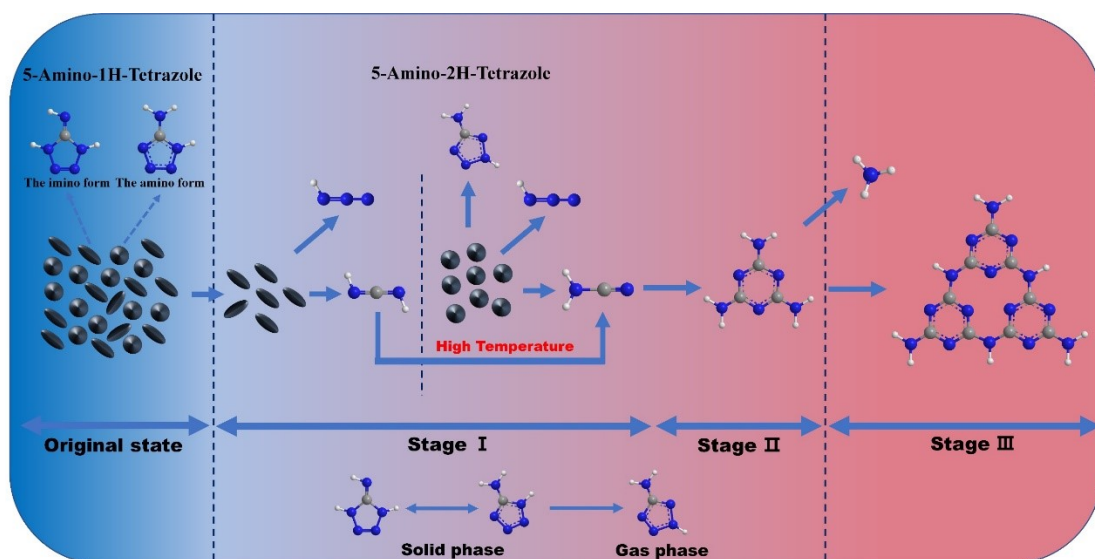

Fig.S4 The pyrolysis mechanism of 5-ATZ.

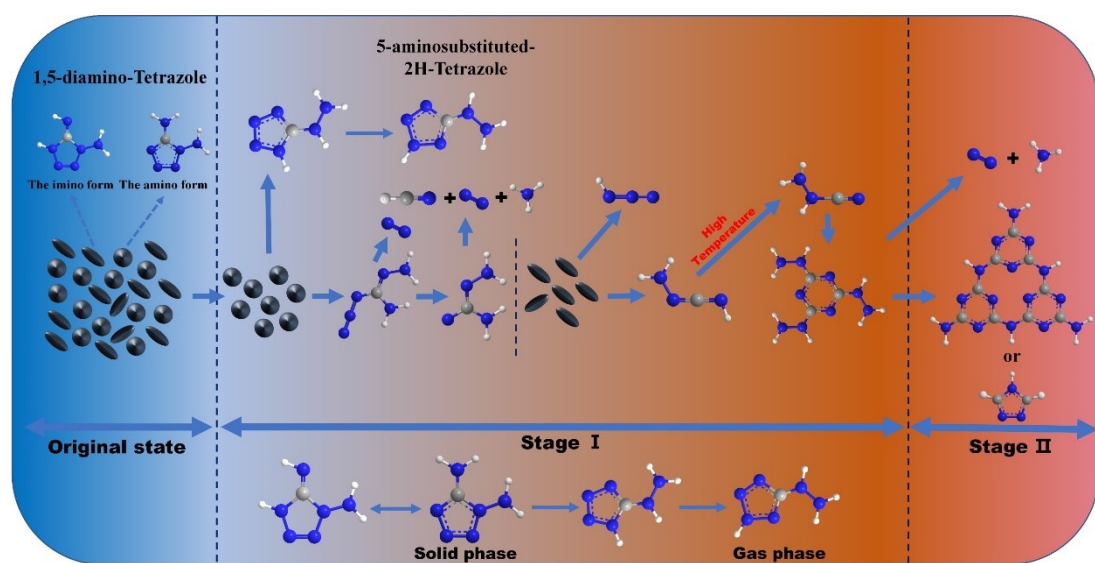

Fig.S5 The pyrolysis mechanism of DATZ.

### S3. The variation of the $E_a$ analysis

**TableS1** During the thermal decomposition process of 5-ATZ+NC, the variation of the  $E_a$  with conversion  $\alpha$  within open environment and the correlation coefficient  $R^2$  at different conversion  $\alpha$ .

| Conversion<br>$\alpha$ | The $E_a$ was calculated by Friedman method |        |         |        | The $E_a$ was calculated by KAS method |        |         |        |
|------------------------|---------------------------------------------|--------|---------|--------|----------------------------------------|--------|---------|--------|
|                        | region①                                     | $R^2$  | Region② | $R^2$  | Region①                                | $R^2$  | Region② | $R^2$  |
| 0.10                   | 166.91                                      | 0.9983 | 180.08  | 0.9970 | 192.68                                 | 0.9993 | 162.90  | 0.9997 |
| 0.15                   | 166.48                                      | 0.9980 | 181.37  | 0.9978 | 187.28                                 | 0.9999 | 164.31  | 0.9993 |
| 0.20                   | 160.70                                      | 0.9971 | 186.31  | 0.9980 | 182.22                                 | 0.9999 | 166.42  | 0.9995 |
| 0.25                   | 157.14                                      | 0.9966 | 188.34  | 0.9974 | 178.50                                 | 0.9998 | 167.37  | 0.9991 |
| 0.30                   | 155.24                                      | 0.9969 | 190.64  | 0.9967 | 176.12                                 | 0.9997 | 168.04  | 0.9996 |
| 0.35                   | 154.51                                      | 0.9970 | 188.48  | 0.9923 | 174.33                                 | 0.9995 | 167.95  | 0.9991 |
| 0.40                   | 154.94                                      | 0.9979 | 187.97  | 0.9847 | 172.61                                 | 0.9998 | 169.48  | 0.9985 |
| 0.45                   | 157.04                                      | 0.9971 | 184.96  | 0.9771 | 171.97                                 | 0.9995 | 171.19  | 0.9988 |
| 0.50                   | 157.86                                      | 0.9981 | 178.65  | 0.9589 | 170.40                                 | 0.9997 | 171.05  | 0.9978 |
| 0.55                   | 159.09                                      | 0.9971 | 170.39  | 0.9459 | 169.72                                 | 0.9993 | 171.24  | 0.9957 |
| 0.60                   | 161.57                                      | 0.9974 | 166.30  | 0.9553 | 169.70                                 | 0.9993 | 173.04  | 0.9935 |
| 0.65                   | 162.66                                      | 0.9971 | 162.36  | 0.9770 | 168.05                                 | 0.9991 | 169.04  | 0.9925 |
| 0.70                   | 165.95                                      | 0.9977 | 166.57  | 0.9868 | 168.62                                 | 0.9995 | 168.53  | 0.9899 |
| 0.75                   | 168.46                                      | 0.9964 | 169.84  | 0.9930 | 167.95                                 | 0.9991 | 170.33  | 0.9911 |
| 0.80                   | 173.18                                      | 0.9970 | 166.50  | 0.9931 | 168.65                                 | 0.9995 | 168.91  | 0.9925 |
| 0.85                   | 176.68                                      | 0.9951 | 163.69  | 0.9873 | 168.05                                 | 0.9991 | 169.20  | 0.9913 |
| 0.90                   | 170.80                                      | 0.9994 | 163.48  | 0.9776 | 168.05                                 | 0.9991 | 167.32  | 0.9900 |

**TableS2** During the thermal decomposition process of 5-ATZ+NC, the variation of the  $E_a$  with conversion  $\alpha$  within closed environment and the correlation coefficient  $R^2$  at different conversion  $\alpha$ .

| Conversion<br>$\alpha$ | The $E_a$ was calculated by Friedman method |        |         |        | The $E_a$ was calculated by KAS method |        |         |        |
|------------------------|---------------------------------------------|--------|---------|--------|----------------------------------------|--------|---------|--------|
|                        | region①                                     | $R^2$  | region① | $R^2$  | region①                                | $R^2$  | region① | $R^2$  |
| 0.10                   | 132.02                                      | 0.9991 | 129.00  | 0.9987 | 158.61                                 | 0.9867 | 136.01  | 0.9990 |
| 0.15                   | 128.32                                      | 0.9993 | 128.92  | 0.9980 | 151.86                                 | 0.9939 | 136.25  | 0.9987 |
| 0.20                   | 121.90                                      | 0.9999 | 128.38  | 0.9980 | 146.48                                 | 0.9952 | 136.01  | 0.9990 |
| 0.25                   | 120.62                                      | 0.9997 | 127.74  | 0.9976 | 144.58                                 | 0.9970 | 135.95  | 0.999  |
| 0.30                   | 124.67                                      | 0.9996 | 126.06  | 0.9965 | 141.17                                 | 0.9981 | 134.88  | 0.9987 |
| 0.35                   | 133.81                                      | 0.9978 | 124.33  | 0.9966 | 139.63                                 | 0.9979 | 133.90  | 0.9991 |
| 0.40                   | 138.63                                      | 0.9976 | 123.32  | 0.9944 | 140.03                                 | 0.9987 | 133.73  | 0.9983 |
| 0.45                   | 138.92                                      | 0.9971 | 120.93  | 0.9943 | 139.40                                 | 0.9992 | 132.85  | 0.9988 |
| 0.50                   | 138.66                                      | 0.9974 | 119.01  | 0.9926 | 139.40                                 | 0.9992 | 132.41  | 0.9983 |
| 0.55                   | 138.06                                      | 0.9970 | 116.77  | 0.9924 | 139.75                                 | 0.9996 | 132.35  | 0.9983 |
| 0.60                   | 135.70                                      | 0.9972 | 113.62  | 0.9907 | 139.75                                 | 0.9996 | 131.28  | 0.9979 |
| 0.65                   | 132.19                                      | 0.9969 | 110.06  | 0.9890 | 138.62                                 | 0.9994 | 130.19  | 0.9973 |
| 0.70                   | 130.32                                      | 0.9981 | 104.78  | 0.9903 | 139.33                                 | 0.9991 | 129.21  | 0.9979 |
| 0.75                   | 127.58                                      | 0.9981 | 96.69   | 0.9930 | 138.62                                 | 0.9994 | 126.14  | 0.9980 |
| 0.80                   | 125.49                                      | 0.9985 | 88.28   | 0.9955 | 137.21                                 | 0.9993 | 123.82  | 0.9975 |
| 0.85                   | 124.31                                      | 0.9982 | 77.25   | 0.9983 | 136.48                                 | 0.9994 | 120.01  | 0.9971 |
| 0.90                   | 124.91                                      | 0.9978 | 64.63   | 0.9813 | 137.47                                 | 0.9991 | 113.17  | 0.9968 |

**TableS3** During the thermal decomposition process of DATZ+NC, the variation of the  $E_a$  with conversion  $\alpha$  within open environment and the correlation coefficient  $R^2$  at different conversion  $\alpha$ .

| Conversion<br>$\alpha$ | The $E_a$ was calculated by Friedman method |        |         |        | The $E_a$ was calculated by KAS method |        |         |        |
|------------------------|---------------------------------------------|--------|---------|--------|----------------------------------------|--------|---------|--------|
|                        | region①                                     | $R^2$  | Region② | $R^2$  | Region①                                | $R^2$  | Region② | $R^2$  |
| 0.10                   | 156.46                                      | 0.9801 | 137.22  | 0.9866 | 117.66                                 | 0.9776 | 146.50  | 0.9970 |
| 0.15                   | 167.00                                      | 0.9491 | 133.45  | 0.9840 | 123.66                                 | 0.9904 | 146.31  | 0.9958 |
| 0.20                   | 172.50                                      | 0.9646 | 129.36  | 0.9811 | 127.69                                 | 0.9960 | 145.44  | 0.9950 |
| 0.25                   | 176.06                                      | 0.9878 | 125.43  | 0.9801 | 131.22                                 | 0.9982 | 143.91  | 0.9955 |
| 0.30                   | 178.01                                      | 0.9921 | 122.99  | 0.9772 | 135.03                                 | 0.9988 | 143.82  | 0.9955 |
| 0.35                   | 175.76                                      | 0.9905 | 118.26  | 0.9687 | 136.55                                 | 0.9994 | 141.28  | 0.9938 |
| 0.40                   | 174.89                                      | 0.9906 | 115.22  | 0.9623 | 139.18                                 | 0.9996 | 141.23  | 0.9937 |
| 0.45                   | 172.74                                      | 0.9894 | 109.79  | 0.9525 | 140.96                                 | 0.9992 | 138.88  | 0.9934 |
| 0.50                   | 170.35                                      | 0.9894 | 103.67  | 0.9292 | 142.43                                 | 0.9989 | 137.40  | 0.9907 |
| 0.55                   | 168.80                                      | 0.9898 | 94.68   | 0.8956 | 144.80                                 | 0.9991 | 134.03  | 0.9893 |
| 0.60                   | 164.29                                      | 0.9867 | 84.85   | 0.8426 | 144.76                                 | 0.9983 | 131.49  | 0.9887 |
| 0.65                   | 160.57                                      | 0.9862 | 73.39   | 0.7520 | 145.15                                 | 0.9984 | 127.74  | 0.9827 |
| 0.70                   | 157.65                                      | 0.9841 | 63.38   | 0.6815 | 146.27                                 | 0.9981 | 121.52  | 0.9769 |
| 0.75                   | 154.62                                      | 0.9821 | 57.54   | 0.6617 | 147.48                                 | 0.9976 | 115.36  | 0.9705 |
| 0.80                   | 149.16                                      | 0.9814 | 54.11   | 0.6969 | 146.20                                 | 0.9969 | 109.37  | 0.9630 |
| 0.85                   | 145.12                                      | 0.9826 | 53.89   | 0.8450 | 146.20                                 | 0.9969 | 102.64  | 0.9561 |
| 0.90                   | 141.39                                      | 0.9840 | 57.86   | 0.9977 | 146.20                                 | 0.9969 | 95.87   | 0.9583 |

**TableS4** During the thermal decomposition process of DATZ+NC, the variation of the  $E_a$  with conversion  $\alpha$  within closed environment and the correlation coefficient  $R^2$  at different conversion  $\alpha$ .

| Conversion<br>$\alpha$ | The $E_a$ was calculated by Friedman method |        |         |        | The $E_a$ was calculated by KAS method |        |         |        |
|------------------------|---------------------------------------------|--------|---------|--------|----------------------------------------|--------|---------|--------|
|                        | region①                                     | $R^2$  | region① | $R^2$  | region①                                | $R^2$  | region① | $R^2$  |
| 0.10                   | 101.67                                      | 0.9854 | 126.36  | 0.9949 | 139.45                                 | 0.9836 | 134.33  | 0.9970 |
| 0.15                   | 97.18                                       | 0.9895 | 124.14  | 0.9946 | 126.13                                 | 0.9826 | 133.24  | 0.9965 |
| 0.20                   | 136.49                                      | 0.9746 | 122.65  | 0.9950 | 126.16                                 | 0.9884 | 132.28  | 0.9972 |
| 0.25                   | 146.21                                      | 0.9923 | 122.20  | 0.9938 | 127.40                                 | 0.9909 | 132.48  | 0.9967 |
| 0.30                   | 151.17                                      | 0.9995 | 120.70  | 0.9939 | 129.10                                 | 0.9943 | 131.64  | 0.9973 |
| 0.35                   | 152.95                                      | 0.9975 | 120.46  | 0.9941 | 131.78                                 | 0.9950 | 131.60  | 0.9973 |
| 0.40                   | 151.49                                      | 0.9966 | 119.14  | 0.9927 | 133.30                                 | 0.9965 | 130.87  | 0.9972 |
| 0.45                   | 147.76                                      | 0.9946 | 117.98  | 0.9935 | 133.67                                 | 0.9964 | 130.46  | 0.9967 |
| 0.50                   | 145.07                                      | 0.9941 | 116.54  | 0.9930 | 135.05                                 | 0.9966 | 129.96  | 0.9976 |
| 0.55                   | 141.31                                      | 0.9939 | 114.31  | 0.9919 | 135.04                                 | 0.9966 | 128.90  | 0.9971 |
| 0.60                   | 136.51                                      | 0.9947 | 111.70  | 0.9910 | 135.05                                 | 0.9966 | 127.85  | 0.9965 |
| 0.65                   | 132.95                                      | 0.9948 | 108.44  | 0.9907 | 135.46                                 | 0.9975 | 126.90  | 0.9970 |
| 0.70                   | 129.74                                      | 0.9956 | 103.61  | 0.9889 | 135.01                                 | 0.9967 | 125.07  | 0.9968 |
| 0.75                   | 127.09                                      | 0.9948 | 98.79   | 0.9880 | 134.40                                 | 0.9971 | 123.84  | 0.9970 |
| 0.80                   | 126.35                                      | 0.9952 | 92.83   | 0.9820 | 134.33                                 | 0.9970 | 121.42  | 0.9963 |
| 0.85                   | 126.60                                      | 0.9951 | 85.68   | 0.9651 | 134.78                                 | 0.9977 | 118.63  | 0.9954 |
| 0.90                   | 125.48                                      | 0.9945 | 78.71   | 0.8899 | 133.71                                 | 0.9972 | 113.68  | 0.9970 |

## S4. The variation of the $E_a$ of NC

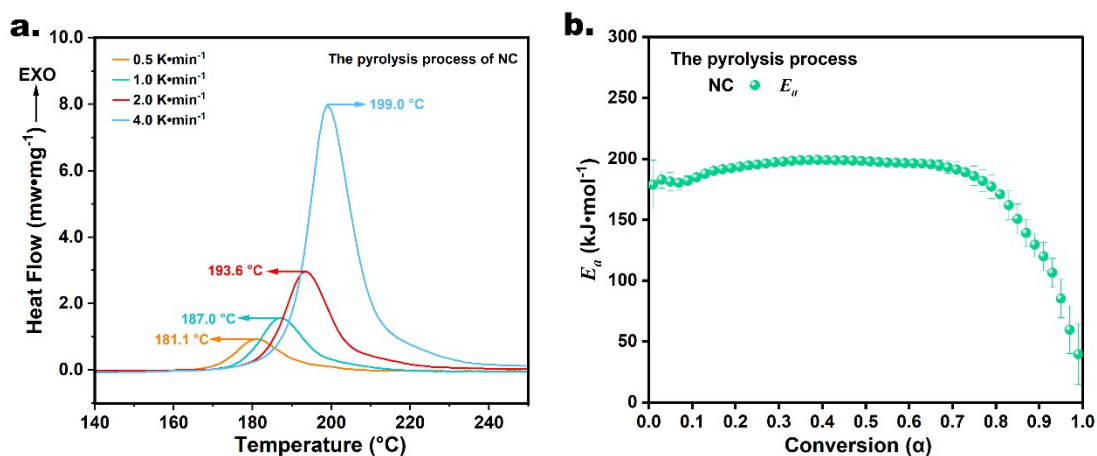

Fig.S6 NC thermal decomposition process: a. DSC curves at different heating rates and b. The  $E_a$  changed with conversion  $\alpha$ .

DSC tests of NC were performed using aluminum crucible with a pinhole. DSC curves of NC at the heating rate of 0.5, 1.0, 2.0, 4.0  $\text{K}\cdot\text{min}^{-1}$  were shown in Fig.S6a. The  $E_a$  at different conversion  $\alpha$  was shown in Fig.S6b. During the thermal decomposition process of NC, the  $E_a$  increased slowly from 178.66  $\text{kJ}\cdot\text{mol}^{-1}$  to 199.06  $\text{kJ}\cdot\text{mol}^{-1}$  when the conversion  $\alpha$  was less than 0.4. When the conversion  $\alpha$  was greater than 0.4 but less than 0.7, the  $E_a$  slowly decreased from 199.06  $\text{kJ}\cdot\text{mol}^{-1}$  to 192.27  $\text{kJ}\cdot\text{mol}^{-1}$ . When the conversion  $\alpha$  was greater than 0.7, the  $E_a$  gradually decreased from 192.27  $\text{kJ}\cdot\text{mol}^{-1}$  to 39.51  $\text{kJ}\cdot\text{mol}^{-1}$ .

## S5. Kinetics model analysis

TableS5 The characteristic parameters of Peak1 and Peak2 in the thermal decomposition process of 5-ATZ and NC mixture in a closed environment by Fityk software using the Fraser-Suzuki function.

| $\beta$ ( $\text{K}\cdot\text{min}^{-1}$ ) | Peak Index | $H_p$ | $T_p$  | $W_{hf}$ | $A_s$ | Area (%) | $R^2$  |
|--------------------------------------------|------------|-------|--------|----------|-------|----------|--------|
| 0.5                                        | 1          | 0.29  | 165.39 | 31.37    | 0.04  | 44.33    | 0.9978 |
|                                            | 2          | 0.97  | 171.12 | 11.83    | -0.04 | 55.67    |        |
| 1.0                                        | 1          | 0.73  | 173.28 | 32.19    | 0.04  | 44.00    | 0.9990 |
|                                            | 2          | 2.54  | 178.49 | 11.79    | -0.04 | 56.00    |        |
| 2.0                                        | 1          | 1.20  | 182.10 | 34.47    | 0.04  | 42.84    | 0.9989 |
|                                            | 2          | 4.40  | 186.45 | 12.56    | -0.04 | 57.16    |        |
| 4.0                                        | 1          | 1.94  | 193.63 | 40.51    | 0.04  | 48.65    | 0.9992 |
|                                            | 2          | 5.91  | 195.08 | 13.97    | -0.04 | 51.35    |        |

**TableS6** The characteristic parameters of Peak0, Peak1 and Peak2 in the thermal decomposition process of DATZ and NC mixture in a closed environment by Fityk software using the Fraser-Suzuki function.

| $\beta$ (K $\cdot$ min $^{-1}$ ) | Peak Index | $H_p$ | $T_p$  | $W_{hf}$ | $A_s$ | Area (%) | R <sup>2</sup> |
|----------------------------------|------------|-------|--------|----------|-------|----------|----------------|
| 0.5                              | 0          | -0.16 | 163.25 | 4.76     | -0.04 | -        | 0.9990         |
|                                  | 1          | 0.22  | 168.32 | 27.14    | -0.07 | 30.09    |                |
|                                  | 2          | 1.12  | 169.60 | 12.55    | -0.02 | 69.91    |                |
| 1.0                              | 0          | -0.17 | 168.33 | 5.29     | -0.04 | -        | 0.9992         |
|                                  | 1          | 0.31  | 182.52 | 45.37    | -0.07 | 33.60    |                |
|                                  | 2          | 1.89  | 176.52 | 14.66    | -0.02 | 66.40    |                |
| 2.0                              | 0          | -0.78 | 174.99 | 5.57     | -0.04 | -        | 0.9998         |
|                                  | 1          | 0.59  | 191.42 | 50.75    | -0.07 | 27.20    |                |
|                                  | 2          | 5.24  | 184.62 | 14.97    | -0.02 | 72.80    |                |
| 4.0                              | 0          | -0.91 | 180.36 | 5.85     | -0.04 | -        | 0.9998         |
|                                  | 1          | 1.02  | 200.24 | 42.51    | -0.07 | 31.16    |                |
|                                  | 2          | 5.69  | 194.02 | 16.79    | -0.02 | 68.84    |                |

**TableS7** During thermal decomposition process of NC, the optimize parameters of kinetic model.

| Kinetic model                     |                   |                   | Optimize parameters | R <sup>2</sup> | S <sup>2</sup> | MR    | F-Test |
|-----------------------------------|-------------------|-------------------|---------------------|----------------|----------------|-------|--------|
| Friedman method                   |                   |                   |                     | 0.99760        | 3.442          | 0.030 | 5.702  |
| Kinetic model                     | A $\rightarrow$ B | B $\rightarrow$ C |                     |                |                |       |        |
| A $\rightarrow$ B $\rightarrow$ C | C <sub>n</sub>    | F <sub>n</sub>    |                     | 0.99938        | 0.891          | 0.020 | 1.188  |
|                                   | C <sub>n,m</sub>  | F <sub>n</sub>    |                     | 0.99948        | 0.749          | 0.018 | 1.000  |

**TableS8** During thermal decomposition process of the mixture of 5-ATZ and NC, the optimize parameters of kinetic model of Peak2.

| Kinetic model                     |                   |                   | Optimize parameters | R <sup>2</sup> | S <sup>2</sup> | MR    | F-Test |
|-----------------------------------|-------------------|-------------------|---------------------|----------------|----------------|-------|--------|
| Friedman method                   |                   |                   |                     | 0.98599        | 58.035         | 0.095 | 16.522 |
| Kinetic model                     | A $\rightarrow$ B | B $\rightarrow$ C |                     |                |                |       |        |
| A $\rightarrow$ B $\rightarrow$ C | C <sub>n</sub>    | F <sub>n</sub>    |                     | 0.99727        | 11.384         | 0.052 | 2.843  |
|                                   | C <sub>n,m</sub>  | F <sub>n</sub>    |                     | 0.99904        | 4.002          | 0.032 | 1.000  |

**TableS9** During thermal decomposition process of the mixture of DATZ and NC, the optimize parameters of kinetic model of Peak2.

| Kinetic model                     |                   |                   | Optimize parameters | R <sup>2</sup> | S <sup>2</sup> | MR    | F-Test |
|-----------------------------------|-------------------|-------------------|---------------------|----------------|----------------|-------|--------|
| Friedman method                   |                   |                   |                     | 0.99689        | 15.763         | 0.053 | 2.175  |
| Kinetic model                     | A $\rightarrow$ B | B $\rightarrow$ C |                     |                |                |       |        |
| A $\rightarrow$ B $\rightarrow$ C | C <sub>n</sub>    | F <sub>n</sub>    |                     | 0.99678        | 16.301         | 0.067 | 1.976  |
|                                   | C <sub>n,m</sub>  | F <sub>n</sub>    |                     | 0.99837        | 8.245          | 0.042 | 1.000  |



## S6. The thermal decomposition process of NC

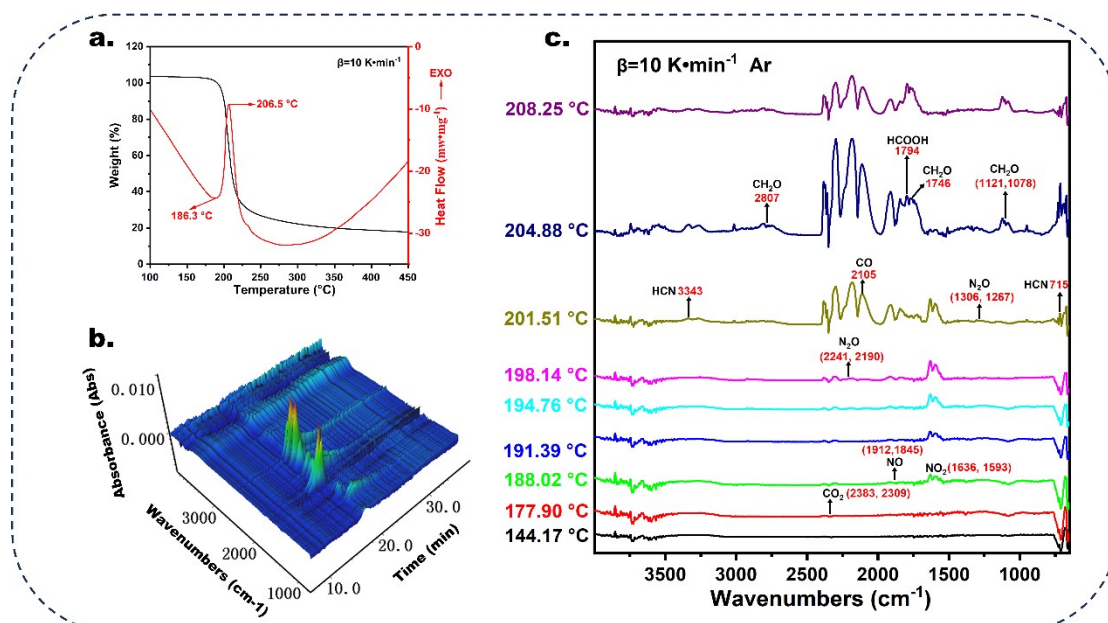

**Fig.S7** The thermal decomposition process of NC at the heating rate of  $10.0 \text{ K}\cdot\text{min}^{-1}$ : (a.) TG-DSC curves, (b.) 3D images and (c.) the characteristic absorption of pyrolysis gas.

From the DTG curve in **Fig.S7a**, it can be observed that the NC became decompose at  $186.3^\circ\text{C}$  and its corresponding peak temperature was  $206.5^\circ\text{C}$ . Based on the decomposition parameters of NC, the decomposition gaseous products were collected and detected by IR and the 3D images as well as its corresponding absorption peaks were obtained, as shown in **Fig.S7b** and **Fig.S7c**. As displayed, the infrared absorption peak of  $\text{CO}_2$  ( $2383 \text{ cm}^{-1}$ ,  $2309 \text{ cm}^{-1}$ ) can be observed at  $177.90^\circ\text{C}$ . Subsequently, the infrared absorption peaks of  $\text{NO}$  ( $1912 \text{ cm}^{-1}$ ,  $1845 \text{ cm}^{-1}$ ) and  $\text{NO}_2$  ( $1636 \text{ cm}^{-1}$ ,  $1593 \text{ cm}^{-1}$ ) can be observed at  $188.02^\circ\text{C}$ . The above phenomenon showed that  $-\text{O}-\text{NO}_2$  bond of NC was broken firstly, forming  $-\text{HC}=\text{O}$  group and  $\text{NO}_2$ . Meanwhile,  $\text{NO}_2$  was retained in the fiber skeleton to further oxidize the residue and accelerate the breakage of the remaining  $-\text{O}-\text{NO}_2$  bond, inter-ring C-O-C bond and intra-ring oxygen bridges. After then, the products of  $\text{NO}_2$ ,  $\text{NO}$ ,  $\text{N}_2\text{O}$  ( $2241 \text{ cm}^{-1}$ ,  $2190 \text{ cm}^{-1}$ ,  $1306 \text{ cm}^{-1}$ ,  $1267 \text{ cm}^{-1}$ ),  $\text{CO}$  ( $2105 \text{ cm}^{-1}$ ),  $\text{CO}_2$ ,  $\text{CH}_2\text{O}$  ( $2807 \text{ cm}^{-1}$ ,  $1746 \text{ cm}^{-1}$ ,  $1123 \text{ cm}^{-1}$ ,  $1073 \text{ cm}^{-1}$ ) and other gases were released further. After the breakage of most of  $-\text{O}-\text{NO}_2$ , the residue further was decomposed, releasing  $\text{HCOOH}$  ( $1794 \text{ cm}^{-1}$ ) and  $\text{HCN}$  ( $715 \text{ cm}^{-1}$ ,  $3343 \text{ cm}^{-1}$ )[1]. Based on above TG-DSC-FTIR results, the thermal decomposition mechanism of the NC was inferred to be a three-step process, as shown in **Fig.S8**.

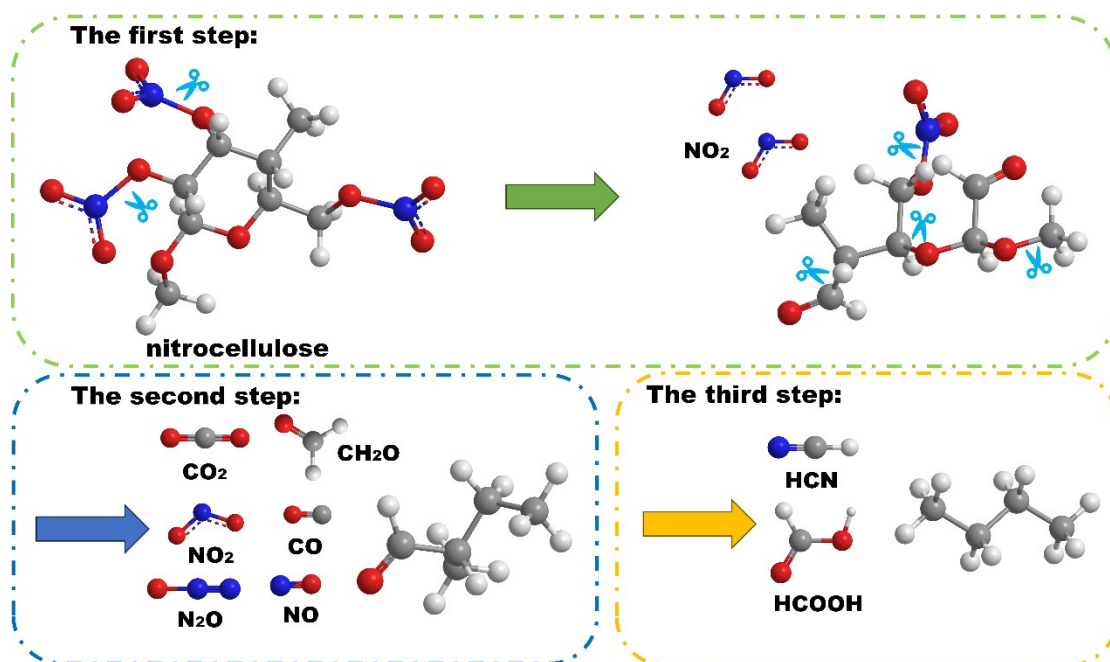

Fig.S8 Thermal decomposition mechanism of NC.
